# Supplementary material
Source: Research Square preprint supplement (doi:10.21203/rs.3.rs-9639310/v1)
Supplement: Supplementary file 1 [file 8d8aa70f368232fd147ada3f.docx]

**Table**. **Mass Spectrometry Analysis of Saponin Compounds in Ginseng.**

| **No.** | **tR/min** | **Identification** | **Formula** | **Ionic mode** | **Predicted** | **Fragmented ion** | **Content (%)** | **formula** |
| --- | --- | --- | --- | --- | --- | --- | --- | --- |
| 1 | 8.85 | Ginsenoside Rg1* | C42H72O14 | [M-H]- | 800.4928 | 799.4865,637.4331,475.3806 | 3.00% | 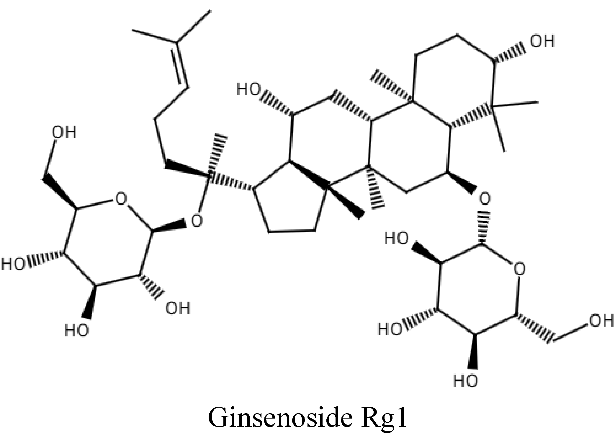 |
| 2 | 9.50 | Ginsenoside Re* | C48H82O18 | [M-H]- | 946.5507 | 945.5466,783.4926,637.4343,475.3815 | 11.78% | 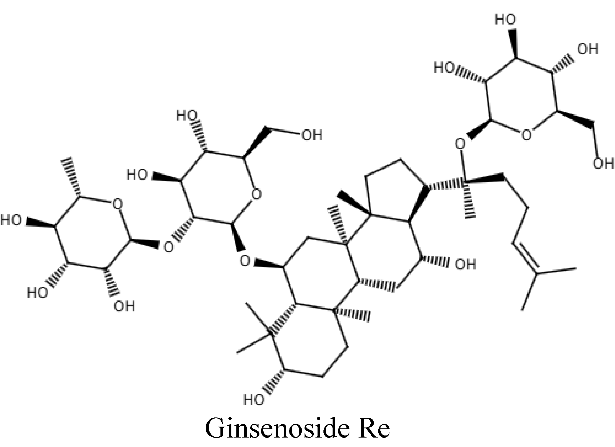 |
| 3 | 18.43 | Ginsenoside Rf | C42H72O14 | [M-H]- | 800.4928 | 799.4885,637.4359,475.3836,304.9168 | 2.34% | 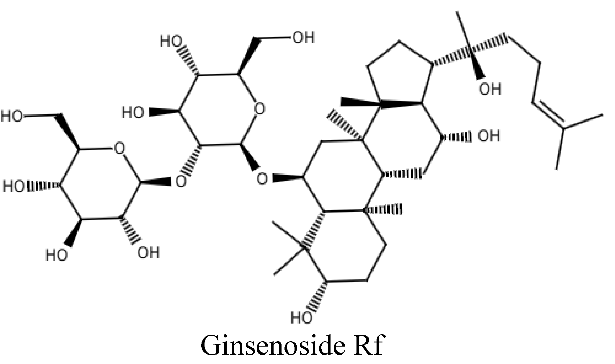 |
| 4 | 19.05 | Noto-ginsenoside R2 | C41H70O13 | [M+HCOO]- | 815.4830 | 769.4772、637.4348、475.3817 |  | 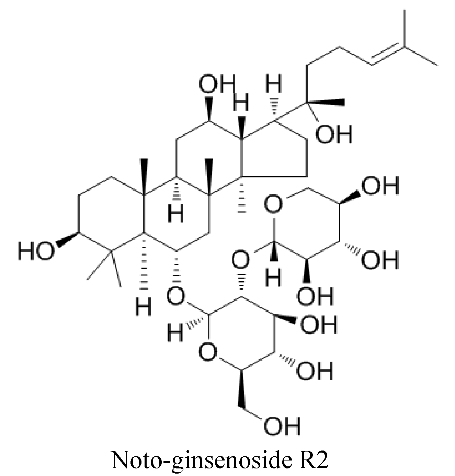 |
| 5 | 20.00 | Ginsenoside Rh1 | C36H62O9 | [M+HCOO]- | 683.4393 | 475.3802 |  | 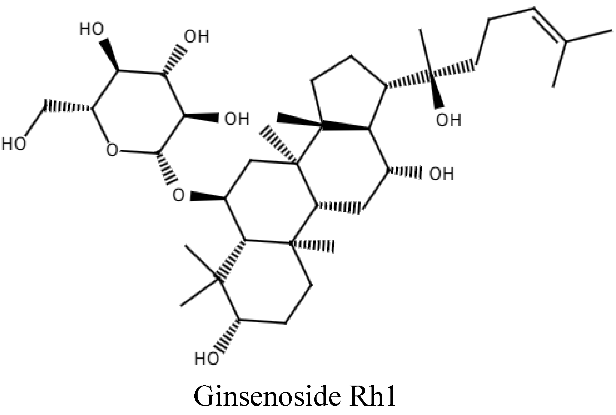 |
| 6 | 20.03 | Ginsenoside Rg2* | C42H72O13 | [M-H]- | 784.4978 | 783.4932,677.4998,637.4354,5888.9855 | 0.98% | 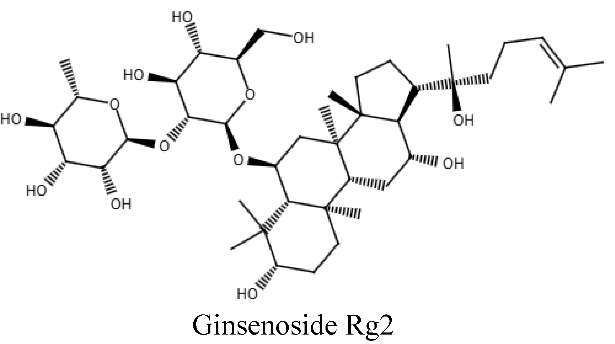 |
| 7 | 21.11 | Ginsenoside Rb1* | C54H92O23 | [M-H]- | 1108.6035 | 1107.6005,945.5458,621.4399,459.3867 | 21.28% | 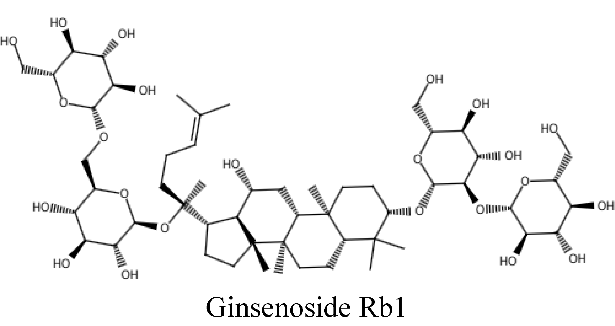 |
| 8 | 22.15 | Ginsenoside Ro* | C48H76O19 | [M-H]- | 956.4986 | 955.4946,793.4407,731.4437,523.3806 | 11.41% | 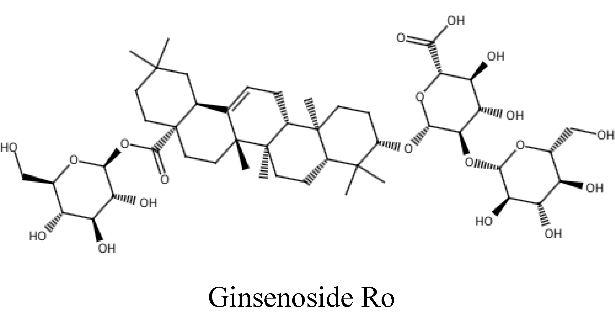 |
| 9 | 23.56 | Ginsenoside Rb2* | C53H90O22 | [M-H]- | 1078.5929 | 1077.5890,945.5439,915.5344,783.4934 | 10.73% | 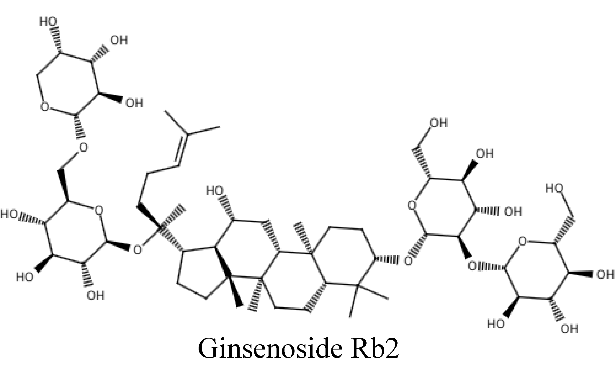 |
| 10 | 23.94 | Ginsenoside Rc | C53H90O22 | [M-H]- | 1078.5929 | 1077.5894,945.5475,621.4399,434.8747 | 0.17% | 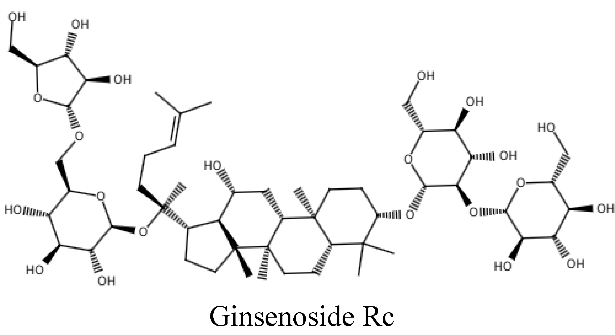 |
| 11 | 26.59 | Ginsenoside Rd* | C48H82O18 | [M-H]- | 946.5507 | 945.5474,783.4929,677.5012,621.4410 | 8.74% | 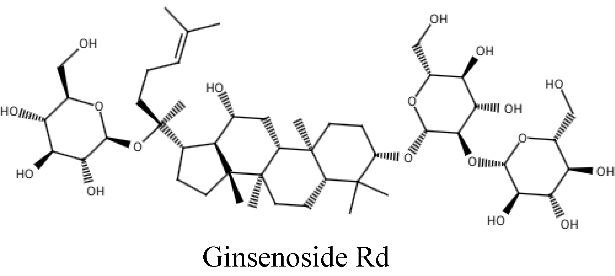 |
